# Supplementary material for: Macrel: antimicrobial peptide screening in genomes and metagenomes
Source: PeerJ journal article supplement (doi:10.7717/peerj.10555), 2020-12-18
Supplement: Supp_Fig_S2.pdf [file Supp_Fig_S2.pdf]

**AMP expression**

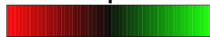

0 2 4 a.u.

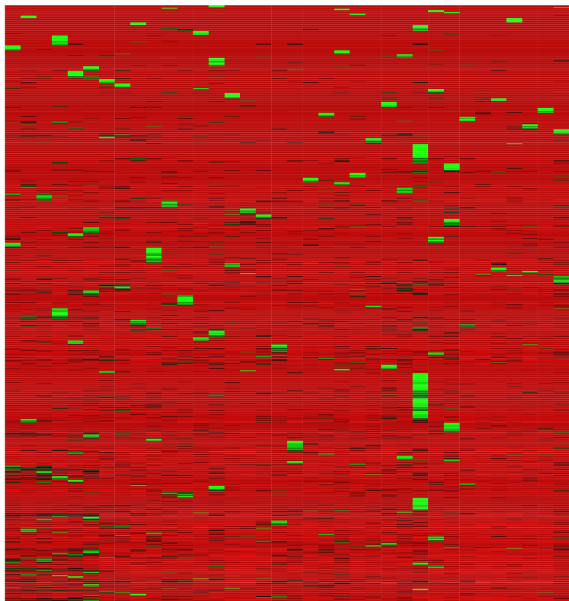

**AMP genes**

**Metagenomes**
